# Supplementary material
Source: HighWire-hosted journal article supplement (http://www.cmaj.ca/highwire/filestream/73660/field_highwire_adjunct_files/0/190289-medsoc-1-at.pdf)
Supplement: 190289-medsoc-1-at.pdf [file 190289-medsoc-1-at.pdf]

## Appendix 1

Supplemental Table 1: Canadian Beta-Blockers, Year entered, Numbers of Makers and Shortages

| Ingredient  | Start Year* | Marketer Firms* | Cancelled Firms* | Shortages (Mar 2017-Dec 2018)** |
|-------------|-------------|-----------------|------------------|---------------------------------|
| Acebutolol  | 1986        | 14              | 11               | 33 (10 D/C)                     |
| Atenolol    | 1988        | 38              | 16               | 66 (10 D/C)                     |
| Bisoprolol  | 2000        | 13              | 5                | 12 (4 D/C)                      |
| Carvedilol  | 1996        | 16              | 8                | 20 (4 D/C)                      |
| Labetalol   | 1984        | 7               | 2                | 10                              |
| Metoprolol  | 1977        | 32              | 14               | 35 (9 D/C)                      |
| Nadolol     | 1979        | 6               | 6                | 0                               |
| Nebivolol   | 2013        | 1               | 0                | 1                               |
| Pindolol    | 1978        | 14              | 9                | 0                               |
| Propranolol | 1974        | 16              | 11               | 12 (1 D/C)                      |
| Sotalol     | 1984        | 20              | 13               | 20 (4 D/C)                      |
| Timolol     | 1977        | 6               | 5                | 19 (2 DC) (all ophthalmics)     |

D/C = discontinuations

Sources: \*Health Canada, *Drug Product Database*, October 2018 <https://www.canada.ca/en/health-canada/services/drugs-health-products/drug-products/drug-product-database.html>

\*\*Drug Shortages Canada, <https://www.drugshortagescanada.ca>

---

## Supplemental Figure 1

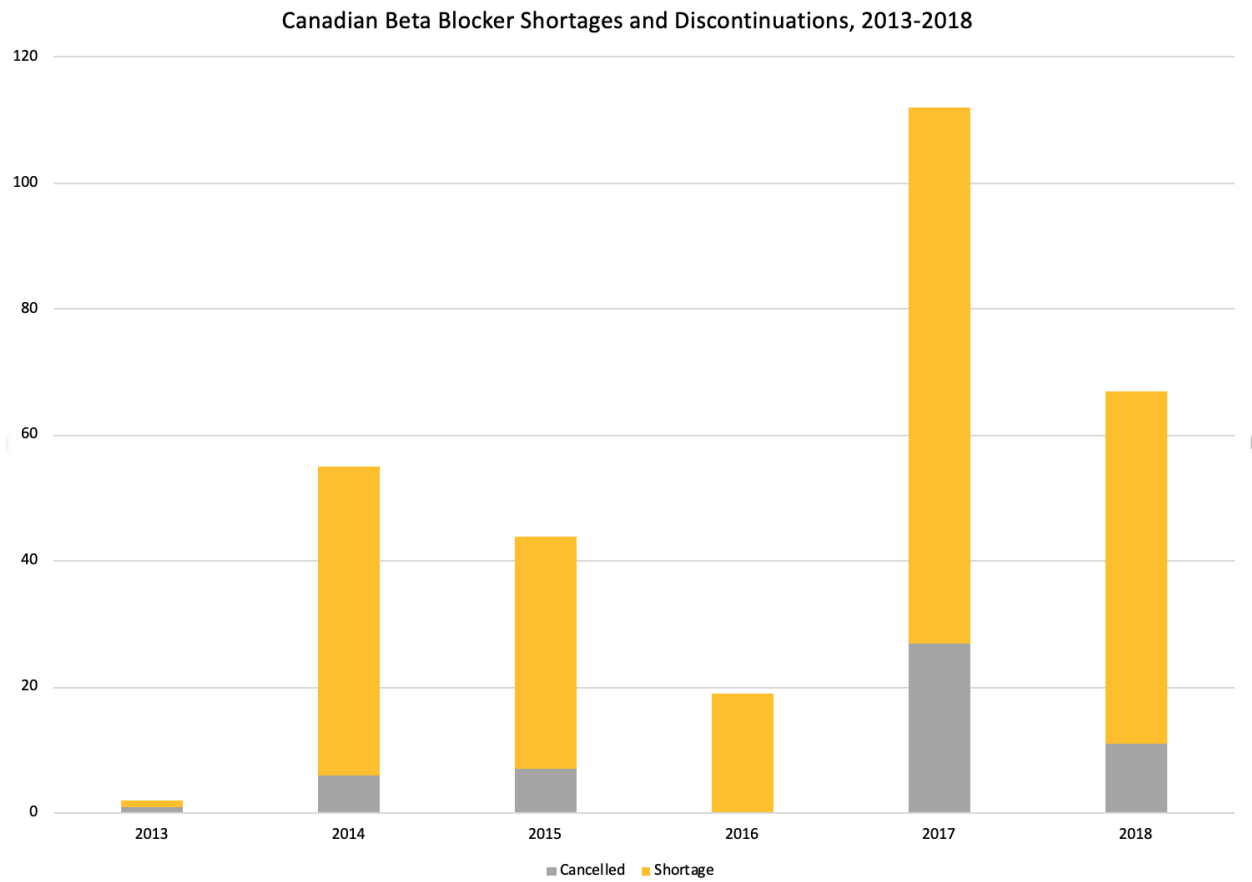

Sources: Drug Shortages Canada <https://www.drugshortagescanada.ca> and the former site [www.drugshortages.ca](http://www.drugshortages.ca).

Supplemental Table 2: Beta-Blockers in Hypertension Guidelines Canada and the United States, 1984-2018

| Year | Canada             | United States      |
|------|--------------------|--------------------|
| 1984 | A <sup>1</sup>     |                    |
| 1989 | A <sup>2</sup>     |                    |
| 1993 | B <sup>3,4</sup>   |                    |
| 1998 |                    | A <sup>5</sup>     |
| 1999 | C <sup>6</sup>     |                    |
| 2001 | C <sup>7</sup>     |                    |
| 2003 |                    | C+; E <sup>8</sup> |
| 2004 | C; E <sup>9</sup>  |                    |
| 2010 | C <sup>10</sup>    |                    |
| 2013 | C; E <sup>11</sup> |                    |
| 2014 |                    | D <sup>12</sup>    |
| 2018 | C; E <sup>13</sup> |                    |

**KEY**

- A first line all ages
- B first line <60 yrs; second line >60 yrs
- C first line <60 yrs; not recommended >60 yrs
- C+ second line all ages, but controversial >65 yrs
- D not recommended for any age
- E for coronary artery disease, age unspecified

<sup>1</sup> AG Logan. CMAJ 1984 Nov 1;131(9):1053–7.

<sup>2</sup> MG Myers et al. CMAJ 1989 May 15;140(10):1141-6.

<sup>3</sup> RI Ogilvie et al. CMAJ 1993 Sep 1;149(5):575–84.

<sup>4</sup> RA Reeves et al. CMAJ 1993 Sep 15;149(6):815–20.

<sup>5</sup> NM Kaplan, JNC6, Am Fam Physician 1998 Oct 15;58(6):1323-30

<sup>6</sup> RD Feldman et al. CMAJ 1999 Dec 14;161(12):S18–S22.

<sup>7</sup> FA McAlister et al. CMAJ 2001 Feb 20;164(4):517–22.

<sup>8</sup> AV Chobanian et al. JNC7, 2003 May 21;289(19):2560 yrs-72. Epub 2003 May 14.

<sup>9</sup> NA Khan et al, Can J Cardiol 2004 Jan;20(1):41-54.

<sup>10</sup> DG Hackam et al. Can J Cardiol 2010 May;26(5):249–58.

<sup>11</sup> DG Hackam et al. Can J Cardiol 2013 May;29(5):528-42.

<sup>12</sup> PA James et al. JNC8, JAMA 2014;311(5):507-20.

<sup>13</sup> KA Nerenberg et al. Can J Cardiol 2018 May;34(5):505–25.
